# Supplementary material for: Structural and Genomic Insights Into Pyrazinamide Resistance in Mycobacterium tuberculosis Underlie Differences Between Ancient and Modern Lineages
Source: Front Mol Biosci. 2021 Jul 23;8:619403. doi: 10.3389/fmolb.2021.619403 (PMC8372558; doi:10.3389/fmolb.2021.619403)
Supplement: Supplementary file 1 [file Table_1.xlsx]

## Sheet: all_mutations
S.No	Mutation	Mutation class	MAF(%)	OR	P-value	OR adjusted	P-wald	DUET ΔΔG	DUET outcome	Distance to ligand (Å)	mCSM-lig (log affinity)	Ligand outcome	Foldx ΔΔG	Foldx outcome	ASA	RSA	Hydrophobicity (KD)	Residue depth
1	M1I	others	0.014374	1.21196	1	NA	NA	-0.347	Destabilising	23.978	-0.294	Destabilising	-0.0549615	Stabilising	88	0.392857	NA	4.12
2	M1K	others	0.00718701	2.42413	1	NA	NA	0.296	Stabilising	23.978	0.215	Stabilising	0.0794895	Destabilising	88	0.392857	NA	4.12
3	M1R	others	NA	NA	NA	NA	NA	0.694	Stabilising	23.978	-0.16	Destabilising	-0.00977971	Stabilising	88	0.392857	NA	4.12
4	M1T	drug associated	0.0718701	97.3829	2.10186e-08	NA	NA	0.109	Stabilising	23.978	0.344	Stabilising	0.867771	Destabilising	88	0.392857	NA	4.12
5	R2L	others	0.00718701	2.42413	1	NA	NA	0.062	Stabilising	21.092	-2.083	Destabilising	1.78755	Destabilising	55	0.20073	-0.266667	4.74
6	R2P	others	NA	NA	NA	NA	NA	-1.031	Destabilising	21.092	-2.244	Destabilising	4.20376	Destabilising	55	0.20073	-0.266667	4.74
7	R2W	others	NA	NA	NA	NA	NA	-0.164	Destabilising	21.092	-1.147	Destabilising	4.38565	Destabilising	55	0.20073	-0.266667	4.74
8	A3E	drug associated	0.028748	38.8547	0.000852828	NA	NA	-2.829	Destabilising	18.028	-1.552	Destabilising	2.75936	Destabilising	0	0	0.366667	8.38
9	A3P	drug associated	0.00718701	9.70143	0.170979	NA	NA	-1.124	Destabilising	18.028	-2.664	Destabilising	-0.155697	Stabilising	0	0	0.366667	8.38
10	L4S	drug associated	0.244358	28.457	5.62633e-18	1.49578	1.24819e-10	-3.87	Destabilising	15.328	-1.078	Destabilising	5.57838	Destabilising	0	0	3.36667	8.8
11	L4V	others	NA	NA	NA	NA	NA	-1.717	Destabilising	15.328	-2.828	Destabilising	1.19624	Destabilising	0	0	3.36667	8.8
12	L4W	drug associated	0.122179	22.7552	7.15796e-09	0.930266	0.594922	-2.169	Destabilising	15.328	-2.216	Destabilising	1.63111	Destabilising	0	0	3.36667	8.8
13	I5S	drug associated	0.00718701	9.70143	0.170979	NA	NA	-3.843	Destabilising	11.437	-0.778	Destabilising	5.83176	Destabilising	0	0	4.26667	12.6
14	I5T	drug associated	0.028748	14.5631	0.017414	1.1311	0.479173	-3.43	Destabilising	11.437	-0.945	Destabilising	3.67776	Destabilising	0	0	4.26667	12.6
15	I6L	others	0.970246	0.38531	0.00173557	0.707028	2.15443e-13	-0.548	Destabilising	9.258	-3.018	Destabilising	0.267883	Destabilising	1	0.00507614	4.4	11.36
16	I6M	drug associated	NA	NA	NA	NA	NA	-1.021	Destabilising	9.258	-3.085	Destabilising	0.24349	Destabilising	1	0.00507614	4.4	11.36
17	I6S	drug associated	0.014374	19.411	0.0292236	1.50549	0.0259561	-3.585	Destabilising	9.258	-1.047	Destabilising	6.01751	Destabilising	1	0.00507614	4.4	11.36
18	I6T	drug associated	0.0646831	87.6076	1.23318e-07	1.34208	0.0043363	-3.089	Destabilising	9.258	-1.244	Destabilising	3.71452	Destabilising	1	0.00507614	4.4	11.36
19	I6V	others	NA	NA	NA	NA	NA	-1.528	Destabilising	9.258	-2.761	Destabilising	1.33147	Destabilising	1	0.00507614	4.4	11.36
20	V7A	others	0.00718701	2.42413	1	NA	NA	-2.592	Destabilising	5.336	-0.97	Destabilising	3.42668	Destabilising	0	0	1.73333	11.02
21	V7F	drug associated	0.021561	9.70467	0.0776845	1.32477	0.0822707	-1.877	Destabilising	5.336	0.042	Stabilising	4.86315	Destabilising	0	0	1.73333	11.02
22	V7G	drug associated	0.129366	39.0453	5.52265e-11	1.52947	5.29487e-06	-3.114	Destabilising	5.336	-1.062	Destabilising	5.26226	Destabilising	0	0	1.73333	11.02
23	V7I	drug associated	NA	NA	NA	NA	NA	-0.898	Destabilising	5.336	-0.635	Destabilising	-1.10338	Stabilising	0	0	1.73333	11.02
24	V7L	drug associated	0.0934311	10.9472	4.53835e-05	1.14331	0.381641	-1.137	Destabilising	5.336	-0.589	Destabilising	-0.847275	Stabilising	0	0	1.73333	11.02
25	D8A	drug associated	0.014374	19.411	0.0292236	NA	NA	-0.511	Destabilising	3.22	-3.268	Destabilising	0.541028	Destabilising	5	0.0259067	1.63333	9.48
26	D8E	drug associated	0.028748	14.5631	0.017414	1.18934	0.145575	-0.786	Destabilising	3.22	0.012	Stabilising	1.90122	Destabilising	5	0.0259067	1.63333	9.48
27	D8G	drug associated	0.0790571	48.6872	1.95392e-07	1.25244	0.0441907	-0.851	Destabilising	3.22	-3.445	Destabilising	1.89305	Destabilising	5	0.0259067	1.63333	9.48
28	D8N	drug associated	0.050309	29.1631	0.00014853	1.23765	0.00709815	-1.182	Destabilising	3.22	-1.655	Destabilising	-1.26057	Stabilising	5	0.0259067	1.63333	9.48
29	V9A	drug associated	0.021561	0.807902	1	NA	NA	-2.467	Destabilising	6.555	-1.286	Destabilising	2.03689	Destabilising	0	0	-0.933333	9.57
30	V9G	drug associated	0.035935	19.4257	0.00368169	1.4054	0.0102953	-3.236	Destabilising	6.555	-1.063	Destabilising	3.70952	Destabilising	0	0	-0.933333	9.57
31	Q10E	others	NA	NA	NA	NA	NA	-2.051	Destabilising	6.02	-0.537	Destabilising	3.84692	Destabilising	0	0	-0.933333	8.14
32	Q10H	drug associated	0.0790571	107.166	3.5812e-09	NA	NA	-1.024	Destabilising	6.02	-0.636	Destabilising	3.94633	Destabilising	0	0	-0.933333	8.14
33	Q10L	others	NA	NA	NA	NA	NA	0.641	Stabilising	6.02	-1.694	Destabilising	0.169275	Destabilising	0	0	-0.933333	8.14
34	Q10P	drug associated	2.11298	156.234	1.27823e-207	1.5789	1.69607e-24	-0.631	Destabilising	6.02	-1.771	Destabilising	6.78299	Destabilising	0	0	-0.933333	8.14
35	Q10R	drug associated	0.129366	83.0135	1.31421e-12	1.41775	5.14892e-08	-1.078	Destabilising	6.02	-0.833	Destabilising	8.55341	Destabilising	0	0	-0.933333	8.14
36	N11S	others	0.00718701	2.42413	1	NA	NA	0.315	Stabilising	9.599	-1.515	Destabilising	2.58536	Destabilising	42	0.215385	-3.5	4.28
37	D12A	drug associated	0.179675	5.2761	6.93631e-05	1.00767	0.900022	0.904	Stabilising	7.825	-2.924	Destabilising	0.896575	Destabilising	22	0.11399	-1.4	5.01
38	D12E	drug associated	0.057496	34.0379	2.8861e-05	1.17913	0.367662	-0.21	Destabilising	7.825	-0.42	Destabilising	2.1586	Destabilising	22	0.11399	-1.4	5.01
39	D12G	drug associated	0.050309	29.1631	0.00014853	1.18348	0.135424	0.079	Stabilising	7.825	-3.008	Destabilising	2.26095	Destabilising	22	0.11399	-1.4	5.01
40	D12N	drug associated	0.0646831	17.0175	0.000110545	1.89567	7.66469e-06	0.018	Stabilising	7.825	-1.928	Destabilising	1.58277	Destabilising	22	0.11399	-1.4	5.01
41	D12Y	others	NA	NA	NA	NA	NA	-0.794	Destabilising	7.825	-1.94	Destabilising	4.93098	Destabilising	22	0.11399	-1.4	5.01
42	F13C	others	0.014374	1.21196	1	0.643986	0.00431487	-2.32	Destabilising	3.551	-0.485	Destabilising	2.69734	Destabilising	24	0.1	0.6	6.93
43	F13I	drug associated	0.028748	14.5631	0.017414	NA	NA	-1.762	Destabilising	3.551	-0.45	Destabilising	0.887245	Destabilising	24	0.1	0.6	6.93
44	F13L	drug associated	0.057496	34.0379	2.8861e-05	1.36749	0.0022872	-2.033	Destabilising	3.551	-0.427	Destabilising	1.0968	Destabilising	24	0.1	0.6	6.93
45	F13S	drug associated	0.028748	1.61648	0.527694	0.596567	0.000306596	-3.104	Destabilising	3.551	0.218	Stabilising	2.59174	Destabilising	24	0.1	0.6	6.93
46	F13V	others	0.014374	1.21196	1	NA	NA	-2.57	Destabilising	3.551	-0.562	Destabilising	1.40193	Destabilising	24	0.1	0.6	6.93
47	C14G	drug associated	0.0934311	4.16399	0.0142887	0.856157	0.122327	-0.534	Destabilising	8.493	-1.214	Destabilising	1.40101	Destabilising	1	0.00598802	0.6	5.76
48	C14R	drug associated	0.344976	42.4478	5.27269e-28	1.25141	0.000909712	-0.333	Destabilising	8.493	-1.215	Destabilising	-1.79171	Stabilising	1	0.00598802	0.6	5.76
49	C14W	drug associated	0.021561	9.70467	0.0776845	0.867724	0.371401	-1.426	Destabilising	8.493	-0.421	Destabilising	3.56718	Destabilising	1	0.00598802	0.6	5.76
50	C14Y	drug associated	0.014374	4.85029	0.312734	NA	NA	-0.931	Destabilising	8.493	-0.604	Destabilising	-0.852908	Stabilising	1	0.00598802	0.6	5.76
51	E15D	others	NA	NA	NA	NA	NA	-0.135	Destabilising	11.854	0.146	Stabilising	2.38936	Destabilising	92	0.412556	-0.466667	3.7
52	E15G	others	0.035935	0.484657	0.596112	0.490373	1.62212e-07	0.063	Stabilising	11.854	-0.81	Destabilising	2.82636	Destabilising	92	0.412556	-0.466667	3.7
53	G17A	others	0.00718701	9.70143	0.170979	NA	NA	-0.03	Destabilising	11.288	-0.016	Destabilising	4.40656	Destabilising	18	0.173077	-0.533333	3.87
54	G17D	drug associated	0.035935	19.4257	0.00368169	1.10428	0.465724	-0.552	Destabilising	11.288	1.678	Stabilising	15.5901	Destabilising	18	0.173077	-0.533333	3.87
55	G17R	others	0.00718701	9.70143	0.170979	NA	NA	-0.058	Destabilising	11.288	0.099	Stabilising	13.8675	Destabilising	18	0.173077	-0.533333	3.87
56	G17S	others	0.021561	2.42494	0.430259	0.785572	0.121351	-0.437	Destabilising	11.288	0.598	Stabilising	8.97262	Destabilising	18	0.173077	-0.533333	3.87
57	S18P	drug associated	0.00718701	2.42413	1	NA	NA	-0.521	Destabilising	9.173	-1.13	Destabilising	1.09268	Destabilising	53	0.341935	0.866667	3.72
58	L19P	drug associated	0.035935	19.4257	0.00368169	1.2829	0.0365028	-1.791	Destabilising	5.113	-1.723	Destabilising	2.98164	Destabilising	27	0.134328	1.6	4.47
59	L19R	drug associated	0.021561	9.70467	0.0776845	NA	NA	-1.418	Destabilising	5.113	-0.665	Destabilising	2.62574	Destabilising	27	0.134328	1.6	4.47
60	L19V	others	0.00718701	2.42413	1	NA	NA	-2.048	Destabilising	5.113	-1.722	Destabilising	1.25265	Destabilising	27	0.134328	1.6	4.47
61	A20P	others	NA	NA	NA	NA	NA	-0.313	Destabilising	9.104	-0.318	Destabilising	-1.37798	Stabilising	52	0.403101	3.26667	3.81
62	A20S	others	NA	NA	NA	NA	NA	-0.846	Destabilising	9.104	0.467	Stabilising	-0.127919	Stabilising	52	0.403101	3.26667	3.81
63	V21A	drug associated	0.014374	4.85029	0.312734	1.13693	0.426861	-1.742	Destabilising	6.521	-0.327	Destabilising	1.43401	Destabilising	9	0.0517241	1.76667	4.94
64	V21G	drug associated	0.043122	24.2923	0.000749407	1.32644	0.034828	-2.004	Destabilising	6.521	-0.391	Destabilising	2.37287	Destabilising	9	0.0517241	1.76667	4.94
65	V21I	others	NA	NA	NA	NA	NA	-0.748	Destabilising	6.521	-0.188	Destabilising	-0.568333	Stabilising	9	0.0517241	1.76667	4.94
66	T22A	others	NA	NA	NA	NA	NA	0.118	Stabilising	11.195	-0.361	Destabilising	-0.193269	Stabilising	127	0.738372	1.03333	3.6
67	T22P	others	NA	NA	NA	NA	NA	0.063	Stabilising	11.195	-0.353	Destabilising	-1.50027	Stabilising	127	0.738372	1.03333	3.6
68	G23V	drug associated	0.00718701	2.42413	1	NA	NA	-0.781	Destabilising	11.963	-0.147	Destabilising	2.85361	Destabilising	28	0.269231	-0.5	3.83
69	G24D	drug associated	0.050309	29.1631	0.00014853	1.09186	0.463605	-2.197	Destabilising	10.19	1.138	Stabilising	4.32448	Destabilising	0	0	0.333333	5.96
70	G24R	drug associated	0.00718701	9.70143	0.170979	NA	NA	-1.19	Destabilising	10.19	-0.978	Destabilising	6.83709	Destabilising	0	0	0.333333	5.96
71	G24S	others	0.00718701	9.70143	0.170979	NA	NA	-1.524	Destabilising	10.19	-0.034	Destabilising	-0.205598	Stabilising	0	0	0.333333	5.96
72	G24V	others	0.00718701	2.42413	1	NA	NA	-0.186	Destabilising	10.19	-1.361	Destabilising	2.33197	Destabilising	0	0	0.333333	5.96
73	A25V	others	NA	NA	NA	NA	NA	-0.514	Destabilising	12.121	-0.995	Destabilising	-0.280715	Stabilising	26	0.20155	1.06667	4.5
74	L27P	drug associated	0.0718701	19.4568	2.34381e-05	1.29578	0.00438956	-1.624	Destabilising	9.548	-1.558	Destabilising	4.6599	Destabilising	11	0.0547264	2.46667	5.14
75	L27Q	others	NA	NA	NA	NA	NA	-1.081	Destabilising	9.548	0.134	Stabilising	2.24048	Destabilising	11	0.0547264	2.46667	5.14
76	L27R	others	0.014374	4.85029	0.312734	NA	NA	-0.738	Destabilising	9.548	-1.016	Destabilising	2.15593	Destabilising	11	0.0547264	2.46667	5.14
77	A28D	drug associated	0.00718701	9.70143	0.170979	NA	NA	-2.8	Destabilising	12.7	0.554	Stabilising	3.01687	Destabilising	0	0	0.366667	6.48
78	A28T	others	NA	NA	NA	NA	NA	-1.901	Destabilising	12.7	-0.289	Destabilising	-0.611286	Stabilising	0	0	0.366667	6.48
79	A30V	others	0.00718701	9.70143	0.170979	NA	NA	-0.401	Destabilising	16.46	-0.846	Destabilising	-0.154342	Stabilising	37	0.286822	0.6	3.88
80	I31S	drug associated	0.043122	58.3312	2.48532e-05	1.37173	0.00789998	-3.608	Destabilising	11.654	-0.329	Destabilising	4.81248	Destabilising	0	0	1.83333	6.99
81	I31T	others	0.00718701	2.42413	1	NA	NA	-3.12	Destabilising	11.654	-0.358	Destabilising	3.06922	Destabilising	0	0	1.83333	6.99
82	S32G	others	NA	NA	NA	NA	NA	-0.875	Destabilising	16.787	-1.334	Destabilising	0.0485616	Destabilising	7	0.0451613	0.0666667	4.62
83	S32I	drug associated	0.00718701	9.70143	0.170979	NA	NA	0.018	Stabilising	16.787	-1.207	Destabilising	0.86851	Destabilising	7	0.0451613	0.0666667	4.62
84	D33V	others	0.00718701	9.70143	0.170979	NA	NA	0.276	Stabilising	20.313	-0.795	Destabilising	1.48114	Destabilising	77	0.398964	-1.86667	3.72
85	Y34C	others	NA	NA	NA	NA	NA	-1.829	Destabilising	18.259	-0.635	Destabilising	1.92562	Destabilising	26	0.0988593	-0.333333	4.65
86	Y34D	drug associated	0.057496	14.5803	0.000507535	1.17129	0.159453	-1.857	Destabilising	18.259	0.124	Stabilising	2.0881	Destabilising	26	0.0988593	-0.333333	4.65
87	Y34S	drug associated	0.014374	1.21196	1	NA	NA	-3.224	Destabilising	18.259	-0.316	Destabilising	0.32836	Destabilising	26	0.0988593	-0.333333	4.65
88	L35M	others	NA	NA	NA	NA	NA	-1.162	Destabilising	17.42	-1.12	Destabilising	-0.61263	Stabilising	35	0.174129	1.43333	4.69
89	L35P	drug associated	0.057496	4.85516	0.0333865	0.998179	0.986916	-2.054	Destabilising	17.42	-0.954	Destabilising	8.91998	Destabilising	35	0.174129	1.43333	4.69
90	L35R	others	0.258732	0.284615	0.0746088	1.30045	0.0579751	-1.493	Destabilising	17.42	-0.653	Destabilising	-2.11958	Stabilising	35	0.174129	1.43333	4.69
91	E37V	others	0.00718701	2.42413	1	NA	NA	-0.033	Destabilising	24.08	-0.519	Destabilising	0.085964	Destabilising	138	0.618834	0.0333333	3.58
92	Y41C	others	0.00718701	2.42413	1	NA	NA	-1.057	Destabilising	19.063	-1.07	Destabilising	4.03027	Destabilising	35	0.13308	-2.66667	4.97
93	Y41D	others	0.00718701	9.70143	0.170979	NA	NA	-2.11	Destabilising	19.063	-0.298	Destabilising	5.35024	Destabilising	35	0.13308	-2.66667	4.97
94	H43D	others	0.00718701	2.42413	1	NA	NA	-1.596	Destabilising	19.543	-0.912	Destabilising	3.54222	Destabilising	40	0.178571	-0.733333	4.75
95	H43P	drug associated	NA	NA	NA	NA	NA	-0.892	Destabilising	19.543	-1.878	Destabilising	2.10447	Destabilising	40	0.178571	-0.733333	4.75
96	H43Y	others	NA	NA	NA	NA	NA	0.984	Stabilising	19.543	-1.341	Destabilising	-0.653353	Stabilising	40	0.178571	-0.733333	4.75
97	V44A	others	0.00718701	9.70143	0.170979	NA	NA	-2.343	Destabilising	17.073	-1.246	Destabilising	3.40395	Destabilising	13	0.0747126	1.73333	5.57
98	V44G	drug associated	0.050309	12.1451	0.0022516	1.07162	0.613654	-2.975	Destabilising	17.073	-1.136	Destabilising	5.19527	Destabilising	13	0.0747126	1.73333	5.57
99	V45A	others	0.00718701	2.42413	1	NA	NA	-2.783	Destabilising	13.521	-2.228	Destabilising	3.60576	Destabilising	0	0	3.4	8.66
100	V45E	others	NA	NA	NA	NA	NA	-3.389	Destabilising	13.521	-1.593	Destabilising	4.70839	Destabilising	0	0	3.4	8.66
101	V45G	drug associated	0.00718701	2.42413	1	NA	NA	-3.523	Destabilising	13.521	-1.938	Destabilising	5.16465	Destabilising	0	0	3.4	8.66
102	A46E	drug associated	0.00718701	9.70143	0.170979	NA	NA	-1.747	Destabilising	11.322	-1.749	Destabilising	2.18089	Destabilising	0	0	1.76667	8.13
103	A46P	drug associated	0.014374	19.411	0.0292236	NA	NA	-0.221	Destabilising	11.322	-2.408	Destabilising	2.09234	Destabilising	0	0	1.76667	8.13
104	A46T	others	0.014374	4.85029	0.312734	NA	NA	-1.192	Destabilising	11.322	-1.355	Destabilising	-1.34478	Stabilising	0	0	1.76667	8.13
105	A46V	drug associated	0.043122	9.712	0.00954625	0.903027	0.417956	1.017	Stabilising	11.322	-2.718	Destabilising	-2.38862	Stabilising	0	0	1.76667	8.13
106	T47A	drug associated	0.0862441	4.85841	0.00897688	0.711658	0.000262693	-1.71	Destabilising	7.503	-2.172	Destabilising	2.87617	Destabilising	0	0	-0.933333	10.3
107	T47I	others	0.035935	1.21226	1	0.67876	0.0263031	-0.155	Destabilising	7.503	-2.112	Destabilising	-1.0395	Stabilising	0	0	-0.933333	10.3
108	T47N	others	0.00718701	2.42413	1	NA	NA	-1.831	Destabilising	7.503	-0.208	Destabilising	0.956982	Destabilising	0	0	-0.933333	10.3
109	T47P	drug associated	0.014374	1.21196	1	NA	NA	-1.493	Destabilising	7.503	-1.892	Destabilising	1.93613	Destabilising	0	0	-0.933333	10.3
110	K48E	drug associated	0.0646831	6.0715	0.00997945	1.01149	0.918099	-1.833	Destabilising	7.546	-1.91	Destabilising	2.3862	Destabilising	19	0.0805085	-2.7	6.78
111	K48N	others	0.014374	1.21196	1	NA	NA	-2.178	Destabilising	7.546	-1.168	Destabilising	2.2078	Destabilising	19	0.0805085	-2.7	6.78
112	K48Q	others	NA	NA	NA	NA	NA	-1.537	Destabilising	7.546	-1.653	Destabilising	1.38977	Destabilising	19	0.0805085	-2.7	6.78
113	K48T	drug associated	0.114992	3.77937	0.0115372	0.695501	0.00304441	-1.92	Destabilising	7.546	-2.085	Destabilising	2.8148	Destabilising	19	0.0805085	-2.7	6.78
114	D49A	drug associated	0.043122	58.3312	2.48532e-05	1.66639	3.16802e-06	-0.451	Destabilising	3.452	-3.348	Destabilising	-2.06724	Stabilising	7	0.0362694	-1.53333	7.89
115	D49E	drug associated	0.021561	9.70467	0.0776845	NA	NA	-0.472	Destabilising	3.452	0.251	Stabilising	-0.696543	Stabilising	7	0.0362694	-1.53333	7.89
116	D49G	drug associated	0.050309	29.1631	0.00014853	1.66269	4.38119e-08	-1.157	Destabilising	3.452	-3.463	Destabilising	0.460983	Destabilising	7	0.0362694	-1.53333	7.89
117	D49N	drug associated	0.057496	77.8406	7.23264e-07	1.51206	0.000314075	-1.684	Destabilising	3.452	-1.932	Destabilising	-0.334669	Stabilising	7	0.0362694	-1.53333	7.89
118	D49Y	drug associated	0.00718701	9.70143	0.170979	NA	NA	-0.739	Destabilising	3.452	-1.855	Destabilising	-2.66914	Stabilising	7	0.0362694	-1.53333	7.89
119	H51D	drug associated	0.301854	414.608	4.49141e-33	1.98875	4.55176e-05	-2.198	Destabilising	5.661	-1.821	Destabilising	4.34022	Destabilising	1	0.00446429	1.36667	6.97
120	H51N	drug associated	NA	NA	NA	NA	NA	-2.215	Destabilising	5.661	-1.063	Destabilising	1.03208	Destabilising	1	0.00446429	1.36667	6.97
121	H51P	drug associated	0.021561	2.42494	0.430259	1.1773	0.310504	-1.762	Destabilising	5.661	-2.624	Destabilising	2.82591	Destabilising	1	0.00446429	1.36667	6.97
122	H51Q	drug associated	0.043122	24.2923	0.000749407	1.89359	0.000435296	-1.714	Destabilising	5.661	-1.42	Destabilising	-1.10489	Stabilising	1	0.00446429	1.36667	6.97
123	H51R	drug associated	0.129366	24.3909	1.45798e-09	1.20739	0.0291551	-1.766	Destabilising	5.661	-0.862	Destabilising	2.7037	Destabilising	1	0.00446429	1.36667	6.97
124	H51Y	drug associated	0.021561	9.70467	0.0776845	NA	NA	0.122	Stabilising	5.661	-2.046	Destabilising	-1.10156	Stabilising	1	0.00446429	1.36667	6.97
125	I52T	others	NA	NA	NA	NA	NA	-1.196	Destabilising	12.353	0.529	Stabilising	0.950846	Destabilising	82	0.416244	-0.733333	4.09
126	D53E	others	0.00718701	2.42413	1	NA	NA	-0.145	Destabilising	13.16	-0.123	Destabilising	0.906346	Destabilising	103	0.533679	-0.2	3.83
127	P54A	others	0.00718701	2.42413	1	NA	NA	-1.416	Destabilising	9.765	-1.785	Destabilising	2.25796	Destabilising	8	0.0503145	-1.83333	4.91
128	P54L	drug associated	0.237171	22.058	6.54727e-16	0.975468	0.744682	-0.097	Destabilising	9.765	-1.77	Destabilising	3.46567	Destabilising	8	0.0503145	-1.83333	4.91
129	P54Q	drug associated	0.035935	19.4257	0.00368169	1.36035	0.00437801	-1.251	Destabilising	9.765	-0.084	Destabilising	9.94224	Destabilising	8	0.0503145	-1.83333	4.91
130	P54R	others	0.014374	19.411	0.0292236	NA	NA	-0.884	Destabilising	9.765	-0.957	Destabilising	7.06229	Destabilising	8	0.0503145	-1.83333	4.91
131	P54S	others	0.021561	9.70467	0.0776845	NA	NA	-1.837	Destabilising	9.765	-0.307	Destabilising	1.58683	Destabilising	8	0.0503145	-1.83333	4.91
132	G55S	others	NA	NA	NA	NA	NA	-0.912	Destabilising	12.27	0.559	Stabilising	0.441313	Destabilising	36	0.346154	-1.83333	3.54
133	D56E	others	NA	NA	NA	NA	NA	0.434	Stabilising	11.133	-0.01	Destabilising	-0.915918	Stabilising	148	0.766839	-2.36667	3.47
134	H57D	drug associated	0.733075	166.911	2.07661e-72	1.24383	0.104559	-1.854	Destabilising	4.561	-1.283	Destabilising	1.83315	Destabilising	16	0.0714286	-1.3	5.63
135	H57L	drug associated	NA	NA	NA	NA	NA	-0.06	Destabilising	4.561	-1.924	Destabilising	-1.11406	Stabilising	16	0.0714286	-1.3	5.63
136	H57P	drug associated	0.028748	38.8547	0.000852828	1.5451	0.0115827	-1.226	Destabilising	4.561	-2.115	Destabilising	0.15002	Destabilising	16	0.0714286	-1.3	5.63
137	H57Q	others	NA	NA	NA	NA	NA	-1.29	Destabilising	4.561	-0.949	Destabilising	0.84932	Destabilising	16	0.0714286	-1.3	5.63
138	H57R	drug associated	0.186862	254.917	1.01651e-20	1.47929	9.69428e-09	-1.171	Destabilising	4.561	-0.281	Destabilising	1.25273	Destabilising	16	0.0714286	-1.3	5.63
139	H57Y	drug associated	0.021561	29.1288	0.00499313	2.082	7.91615e-06	0.405	Stabilising	4.561	-1.155	Destabilising	-0.147464	Stabilising	16	0.0714286	-1.3	5.63
140	F58L	drug associated	0.0646831	6.0715	0.00997945	1.21212	0.211572	-1.639	Destabilising	8.072	-2.337	Destabilising	0.155134	Destabilising	43	0.179167	-0.4	4.41
141	F58S	drug associated	0.014374	4.85029	0.312734	NA	NA	-2.784	Destabilising	8.072	-0.806	Destabilising	2.9435	Destabilising	43	0.179167	-0.4	4.41
142	F58V	others	0.00718701	2.42413	1	NA	NA	-1.927	Destabilising	8.072	-2.319	Destabilising	1.56433	Destabilising	43	0.179167	-0.4	4.41
143	S59F	drug associated	0.00718701	9.70143	0.170979	NA	NA	-0.905	Destabilising	11.829	-0.598	Destabilising	0.176045	Destabilising	38	0.245161	0.533333	3.86
144	S59P	drug associated	0.043122	58.3312	2.48532e-05	1.25447	0.113529	-0.594	Destabilising	11.829	-1.097	Destabilising	3.6058	Destabilising	38	0.245161	0.533333	3.86
145	S59Y	others	0.00718701	9.70143	0.170979	NA	NA	-0.542	Destabilising	11.829	-0.553	Destabilising	0.447426	Destabilising	38	0.245161	0.533333	3.86
146	G60D	others	0.00718701	2.42413	1	NA	NA	-0.161	Destabilising	14.904	0.52	Stabilising	-2.08267	Stabilising	80	0.769231	-0.633333	3.26
147	T61P	drug associated	0.00718701	2.42413	1	NA	NA	-0.204	Destabilising	14.618	-0.472	Destabilising	1.58134	Destabilising	130	0.755814	-0.9	3.48
148	T61R	others	NA	NA	NA	NA	NA	0.174	Stabilising	14.618	-0.01	Destabilising	-0.362941	Stabilising	130	0.755814	-0.9	3.48
149	P62L	drug associated	0.0790571	48.6872	1.95392e-07	1.87439	5.68729e-08	-0.504	Destabilising	11.121	-0.276	Destabilising	1.77658	Destabilising	34	0.213836	-1.93333	3.99
150	P62Q	drug associated	NA	NA	NA	NA	NA	-0.763	Destabilising	11.121	0.708	Stabilising	1.97038	Destabilising	34	0.213836	-1.93333	3.99
151	P62R	drug associated	NA	NA	NA	NA	NA	-0.186	Destabilising	11.121	0.023	Stabilising	2.51854	Destabilising	34	0.213836	-1.93333	3.99
152	P62S	drug associated	0.035935	1.21226	1	0.802057	0.0471453	-1.342	Destabilising	11.121	0.534	Stabilising	1.54135	Destabilising	34	0.213836	-1.93333	3.99
153	P62T	others	0.021561	29.1288	0.00499313	1.76074	0.000637163	-1.056	Destabilising	11.121	0.522	Stabilising	2.20908	Destabilising	34	0.213836	-1.93333	3.99
154	D63A	drug associated	0.0934311	26.787	1.98964e-07	1.42268	6.78152e-05	-0.714	Destabilising	10.737	-0.769	Destabilising	4.4472	Destabilising	84	0.435233	-2.13333	3.62
155	D63E	others	NA	NA	NA	NA	NA	-0.219	Destabilising	10.737	-0.014	Destabilising	3.8992	Destabilising	84	0.435233	-2.13333	3.62
156	D63G	drug associated	0.057496	4.85516	0.0333865	0.718496	0.0016554	-1.153	Destabilising	10.737	-0.799	Destabilising	4.61622	Destabilising	84	0.435233	-2.13333	3.62
157	D63H	drug associated	0.021561	2.42494	0.430259	1.26453	0.154146	-0.085	Destabilising	10.737	-0.456	Destabilising	4.09043	Destabilising	84	0.435233	-2.13333	3.62
158	D63V	others	NA	NA	NA	NA	NA	0.028	Stabilising	10.737	-0.722	Destabilising	4.48687	Destabilising	84	0.435233	-2.13333	3.62
159	D63Y	others	0.00718701	2.42413	1	NA	NA	0.07	Stabilising	10.737	-0.438	Destabilising	4.37717	Destabilising	84	0.435233	-2.13333	3.62
160	Y64D	drug associated	0.028748	4.85191	0.137955	0.722788	0.0102965	-0.392	Destabilising	8.434	0.546	Stabilising	2.59866	Destabilising	135	0.513308	-1.86667	3.61
161	S65P	others	0.014374	1.21196	1	0.462656	5.40824e-07	-0.032	Destabilising	8.268	-0.499	Destabilising	3.33753	Destabilising	97	0.625806	-0.966667	3.79
162	S66L	others	0.050309	0.346124	0.61138	1.00285	0.992264	0.201	Stabilising	9.005	-0.663	Destabilising	1.22464	Destabilising	71	0.458065	-0.8	3.87
163	S66P	drug associated	0.00718701	9.70143	0.170979	NA	NA	-0.248	Destabilising	9.005	-0.726	Destabilising	1.91796	Destabilising	71	0.458065	-0.8	3.87
164	S67L	others	NA	NA	NA	NA	NA	0.61	Stabilising	8.658	-1.544	Destabilising	0.0243891	Destabilising	15	0.0967742	-0.833333	5.15
165	S67P	drug associated	0.0934311	58.474	6.68324e-09	1.52139	7.54075e-07	-0.228	Destabilising	8.658	-1.699	Destabilising	3.29311	Destabilising	15	0.0967742	-0.833333	5.15
166	S67T	others	NA	NA	NA	NA	NA	-0.129	Destabilising	8.658	-1.302	Destabilising	-0.265321	Stabilising	15	0.0967742	-0.833333	5.15
167	S67W	others	0.00718701	9.70143	0.170979	NA	NA	-0.832	Destabilising	8.658	-0.833	Destabilising	0.201358	Destabilising	15	0.0967742	-0.833333	5.15
168	W68C	drug associated	0.043122	24.2923	0.000749407	1.74753	0.000167099	-1.453	Destabilising	4.974	-1.575	Destabilising	2.68091	Destabilising	45	0.157895	-1.1	5.49
169	W68G	drug associated	0.136553	87.9339	2.35655e-13	1.57812	7.39265e-11	-2.572	Destabilising	4.974	-2.125	Destabilising	4.03792	Destabilising	45	0.157895	-1.1	5.49
170	W68L	drug associated	NA	NA	NA	NA	NA	-1.622	Destabilising	4.974	-2.242	Destabilising	0.192132	Destabilising	45	0.157895	-1.1	5.49
171	W68R	drug associated	0.201236	132.406	4.0347e-20	1.49705	4.25738e-09	-1.608	Destabilising	4.974	-0.576	Destabilising	0.0790982	Destabilising	45	0.157895	-1.1	5.49
172	W68S	drug associated	0.00718701	9.70143	0.170979	NA	NA	-2.673	Destabilising	4.974	-1.036	Destabilising	2.64788	Destabilising	45	0.157895	-1.1	5.49
173	P69L	drug associated	0.043122	24.2923	0.000749407	NA	NA	0.046	Stabilising	7.994	-1.774	Destabilising	2.773	Destabilising	23	0.144654	-1.36667	4.65
174	P69Q	others	0.00718701	2.42413	1	NA	NA	-1.59	Destabilising	7.994	-0.293	Destabilising	2.83344	Destabilising	23	0.144654	-1.36667	4.65
175	P69R	drug associated	0.00718701	2.42413	1	1.29786	0.321402	-1.258	Destabilising	7.994	-0.966	Destabilising	2.33826	Destabilising	23	0.144654	-1.36667	4.65
176	P69S	others	0.014374	1.21196	1	NA	NA	-2.477	Destabilising	7.994	-0.353	Destabilising	3.28838	Destabilising	23	0.144654	-1.36667	4.65
177	P69T	others	0.00718701	9.70143	0.170979	NA	NA	-1.905	Destabilising	7.994	-0.377	Destabilising	2.75187	Destabilising	23	0.144654	-1.36667	4.65
178	H71D	drug associated	0.00718701	9.70143	0.170979	NA	NA	-2.685	Destabilising	4.184	-2.498	Destabilising	5.74525	Destabilising	5	0.0223214	-0.766667	6.25
179	H71N	drug associated	NA	NA	NA	NA	NA	-2.671	Destabilising	4.184	-1.335	Destabilising	0.64378	Destabilising	5	0.0223214	-0.766667	6.25
180	H71P	others	0.014374	4.85029	0.312734	NA	NA	-2.362	Destabilising	4.184	-2.885	Destabilising	3.26218	Destabilising	5	0.0223214	-0.766667	6.25
181	H71Q	drug associated	0.014374	19.411	0.0292236	1.75397	0.000212224	-2.294	Destabilising	4.184	-1.733	Destabilising	1.12335	Destabilising	5	0.0223214	-0.766667	6.25
182	H71R	drug associated	0.050309	1.94026	0.342336	0.8786	0.201213	-1.93	Destabilising	4.184	-0.831	Destabilising	-1.52387	Stabilising	5	0.0223214	-0.766667	6.25
183	H71Y	drug associated	0.179675	25.6733	4.51976e-13	1.48494	5.49901e-08	-0.461	Destabilising	4.184	-1.955	Destabilising	-1.77532	Stabilising	5	0.0223214	-0.766667	6.25
184	C72G	others	NA	NA	NA	NA	NA	-1.759	Destabilising	7.053	-0.725	Destabilising	1.3326	Destabilising	0	0	1.16667	7.01
185	C72R	drug associated	0.021561	9.70467	0.0776845	NA	NA	-1.639	Destabilising	7.053	0.152	Stabilising	7.93343	Destabilising	0	0	1.16667	7.01
186	C72W	drug associated	0.014374	19.411	0.0292236	NA	NA	-1.725	Destabilising	7.053	0.265	Stabilising	27.4558	Destabilising	0	0	1.16667	7.01
187	C72Y	drug associated	0.00718701	9.70143	0.170979	NA	NA	-1.564	Destabilising	7.053	0.154	Stabilising	15.4245	Destabilising	0	0	1.16667	7.01
188	V73D	others	NA	NA	NA	NA	NA	-1.148	Destabilising	10.768	1.153	Stabilising	1.11169	Destabilising	46	0.264368	1.96667	4.66
189	T76I	drug associated	0.021561	29.1288	0.00499313	NA	NA	0.311	Stabilising	14.032	-0.319	Destabilising	-0.781308	Stabilising	56	0.325581	-0.9	3.94
190	T76P	drug associated	0.172488	24.4404	2.23953e-12	1.35288	1.04697e-05	-0.519	Destabilising	14.032	-0.382	Destabilising	1.15155	Destabilising	56	0.325581	-0.9	3.94
191	P77L	others	0.00718701	2.42413	1	NA	NA	0.544	Stabilising	13.235	0.067	Stabilising	0.65747	Destabilising	94	0.591195	-0.9	3.75
192	G78A	others	NA	NA	NA	NA	NA	0.335	Stabilising	9.84	-0.912	Destabilising	1.30582	Destabilising	8	0.0769231	-0.0666667	4.83
193	G78C	drug associated	0.021561	9.70467	0.0776845	1.47486	0.0310311	-1.038	Destabilising	9.84	-0.281	Destabilising	2.40156	Destabilising	8	0.0769231	-0.0666667	4.83
194	G78R	others	NA	NA	NA	NA	NA	-0.272	Destabilising	9.84	-0.84	Destabilising	1.06499	Destabilising	8	0.0769231	-0.0666667	4.83
195	G78S	drug associated	0.021561	9.70467	0.0776845	NA	NA	-0.859	Destabilising	9.84	0.215	Stabilising	0.982763	Destabilising	8	0.0769231	-0.0666667	4.83
196	G78V	drug associated	0.014374	19.411	0.0292236	NA	NA	0.114	Stabilising	9.84	-0.842	Destabilising	2.8237	Destabilising	8	0.0769231	-0.0666667	4.83
197	A79T	others	0.014374	1.21196	1	1.0955	0.77096	-1.881	Destabilising	10.663	-0.176	Destabilising	-0.0668707	Stabilising	1	0.00775194	-0.7	5.8
198	A79V	others	0.035935	0.484657	0.596112	0.970219	0.815377	-0.186	Destabilising	10.663	-1.403	Destabilising	-0.825109	Stabilising	1	0.00775194	-0.7	5.8
199	F81C	others	0.00718701	9.70143	0.170979	NA	NA	-1.592	Destabilising	11.313	-1.003	Destabilising	2.56753	Destabilising	40	0.166667	-1.3	4.56
200	F81S	others	0.014374	1.21196	1	0.781563	0.150697	-2.584	Destabilising	11.313	-0.596	Destabilising	2.44385	Destabilising	40	0.166667	-1.3	4.56
201	F81V	drug associated	0.035935	1.21226	1	0.978052	0.861287	-1.563	Destabilising	11.313	-1.967	Destabilising	2.08972	Destabilising	40	0.166667	-1.3	4.56
202	H82D	drug associated	0.014374	4.85029	0.312734	1.04845	0.766849	-0.198	Destabilising	11.736	0.013	Stabilising	1.78228	Destabilising	33	0.147321	-0.666667	4.73
203	H82R	drug associated	0.043122	24.2923	0.000749407	1.55389	0.000597805	-0.663	Destabilising	11.736	-0.111	Destabilising	-0.0040868	Stabilising	33	0.147321	-0.666667	4.73
204	H82Y	drug associated	NA	NA	NA	NA	NA	0.591	Stabilising	11.736	-0.973	Destabilising	-0.667302	Stabilising	33	0.147321	-0.666667	4.73
205	L85P	drug associated	0.050309	29.1631	0.00014853	1.3961	0.00535664	-1.891	Destabilising	12.428	-1.426	Destabilising	8.82868	Destabilising	9	0.0447761	-0.166667	5.61
206	L85R	drug associated	0.0934311	26.787	1.98964e-07	1.41386	0.000145558	-1.371	Destabilising	12.428	-0.808	Destabilising	2.99904	Destabilising	9	0.0447761	-0.166667	5.61
207	D86G	others	0.00718701	2.42413	1	NA	NA	-0.094	Destabilising	17.129	-1.107	Destabilising	2.19531	Destabilising	97	0.502591	-0.133333	3.88
208	T87M	others	0.0790571	0.220184	0.230011	0.984333	0.91144	-0.4	Destabilising	17.594	-0.692	Destabilising	-1.95982	Stabilising	86	0.5	-1.66667	3.72
209	I90S	drug associated	0.050309	6.47411	0.0192725	0.947144	0.598138	-2.286	Destabilising	14.878	0.447	Stabilising	4.11572	Destabilising	24	0.121827	0.933333	4.88
210	I90T	others	0.028748	14.5631	0.017414	1.07238	0.664679	-1.983	Destabilising	14.878	0.462	Stabilising	2.28269	Destabilising	24	0.121827	0.933333	4.88
211	A92G	others	NA	NA	NA	NA	NA	-0.574	Destabilising	15.57	-1.692	Destabilising	1.40665	Destabilising	11	0.0852713	0.833333	4.62
212	A92P	others	0.00718701	2.42413	1	NA	NA	0.14	Stabilising	15.57	-1.787	Destabilising	0.275359	Destabilising	11	0.0852713	0.833333	4.62
213	A92V	others	NA	NA	NA	NA	NA	0.941	Stabilising	15.57	-1.782	Destabilising	-1.35941	Stabilising	11	0.0852713	0.833333	4.62
214	V93G	others	NA	NA	NA	NA	NA	-2.333	Destabilising	13.206	-0.958	Destabilising	3.06107	Destabilising	27	0.155172	2.93333	4.76
215	V93L	others	NA	NA	NA	NA	NA	-0.015	Destabilising	13.206	-1.213	Destabilising	-1.8226	Stabilising	27	0.155172	2.93333	4.76
216	F94C	drug associated	0.028748	14.5631	0.017414	1.11709	0.491771	-1.595	Destabilising	10.621	-1.615	Destabilising	4.52813	Destabilising	0	0	1.9	7.59
217	F94L	drug associated	0.050309	6.47411	0.0192725	1.18729	0.184214	-1.582	Destabilising	10.621	-1.712	Destabilising	1.1796	Destabilising	0	0	1.9	7.59
218	F94S	drug associated	0.014374	19.411	0.0292236	NA	NA	-3.027	Destabilising	10.621	-0.449	Destabilising	5.85272	Destabilising	0	0	1.9	7.59
219	F94V	others	0.00718701	2.42413	1	NA	NA	-1.995	Destabilising	10.621	-1.681	Destabilising	2.56655	Destabilising	0	0	1.9	7.59
220	Y95D	others	0.00718701	9.70143	0.170979	NA	NA	-0.772	Destabilising	10.528	0.071	Stabilising	4.78106	Destabilising	75	0.285171	-0.8	4.15
221	K96E	drug associated	0.0790571	107.166	3.5812e-09	1.75455	2.78794e-06	-2.119	Destabilising	3.977	-0.673	Destabilising	6.92487	Destabilising	8	0.0338983	-1.86667	5.96
222	K96M	others	0.014374	19.411	0.0292236	NA	NA	0.413	Stabilising	3.977	-1.026	Destabilising	0.273257	Destabilising	8	0.0338983	-1.86667	5.96
223	K96N	drug associated	0.00718701	2.42413	1	NA	NA	-1.156	Destabilising	3.977	0.325	Stabilising	2.61245	Destabilising	8	0.0338983	-1.86667	5.96
224	K96Q	drug associated	0.028748	4.85191	0.137955	0.64259	0.11733	-1.318	Destabilising	3.977	-0.08	Destabilising	1.04409	Destabilising	8	0.0338983	-1.86667	5.96
225	K96R	drug associated	0.107805	19.488	1.66263e-07	1.43416	2.15734e-06	-0.169	Destabilising	3.977	0.083	Stabilising	-0.740521	Stabilising	8	0.0338983	-1.86667	5.96
226	K96T	drug associated	0.0934311	58.474	6.68324e-09	1.84364	2.24605e-13	-0.86	Destabilising	3.977	-0.57	Destabilising	3.53764	Destabilising	8	0.0338983	-1.86667	5.96
227	G97A	others	NA	NA	NA	NA	NA	-1.126	Destabilising	8.236	-1.721	Destabilising	3.72826	Destabilising	7	0.0673077	-0.833333	4.92
228	G97C	drug associated	0.0718701	97.3829	2.10186e-08	2.17429	1.31757e-05	-1.635	Destabilising	8.236	-1.158	Destabilising	4.47159	Destabilising	7	0.0673077	-0.833333	4.92
229	G97D	drug associated	0.251545	29.4508	1.1101e-18	1.53069	1.69932e-06	-2.974	Destabilising	8.236	-0.248	Destabilising	12.1049	Destabilising	7	0.0673077	-0.833333	4.92
230	G97R	drug associated	0.014374	19.411	0.0292236	1.78337	0.000401932	-1.252	Destabilising	8.236	-0.89	Destabilising	4.89479	Destabilising	7	0.0673077	-0.833333	4.92
231	G97S	drug associated	0.0646831	87.6076	1.23318e-07	1.78031	1.55526e-08	-1.999	Destabilising	8.236	-0.309	Destabilising	5.99386	Destabilising	7	0.0673077	-0.833333	4.92
232	G97V	others	0.00718701	9.70143	0.170979	NA	NA	-0.588	Destabilising	8.236	-1.664	Destabilising	6.12241	Destabilising	7	0.0673077	-0.833333	4.92
233	T100A	others	0.028748	4.85191	0.137955	1.12069	0.474355	-0.543	Destabilising	8.272	-1.759	Destabilising	0.408316	Destabilising	81	0.47093	-0.8	4.18
234	T100I	drug associated	0.0646831	38.9169	5.52283e-06	1.43452	0.0276367	0.379	Stabilising	8.272	-1.537	Destabilising	0.808015	Destabilising	81	0.47093	-0.8	4.18
235	T100P	others	0.050309	68.0818	4.24049e-06	1.70496	4.41396e-05	-0.488	Destabilising	8.272	-1.685	Destabilising	1.65141	Destabilising	81	0.47093	-0.8	4.18
236	A102P	others	0.057496	14.5803	0.000507535	0.655576	0.000532969	-1.249	Destabilising	3.5	-0.23	Destabilising	-0.616782	Stabilising	10	0.0775194	0.0333333	5.51
237	A102R	others	0.00718701	2.42413	1	NA	NA	-0.696	Destabilising	3.5	0.174	Stabilising	4.1344	Destabilising	10	0.0775194	0.0333333	5.51
238	A102T	drug associated	0.014374	19.411	0.0292236	1.75173	0.000498352	-0.719	Destabilising	3.5	0.881	Stabilising	-2.02927	Stabilising	10	0.0775194	0.0333333	5.51
239	A102V	others	0.0646831	2.42614	0.188417	0.905539	0.300099	-0.251	Destabilising	3.5	-0.162	Destabilising	-1.90987	Stabilising	10	0.0775194	0.0333333	5.51
240	Y103C	drug associated	0.0718701	3.23621	0.0754031	1.1239	0.216277	0.606	Stabilising	5.416	-0.48	Destabilising	1.02924	Destabilising	138	0.524715	-0.1	3.94
241	Y103D	others	0.21561	142.334	1.23917e-21	NA	NA	1.176	Stabilising	5.416	0.851	Stabilising	1.18458	Destabilising	138	0.524715	-0.1	3.94
242	Y103H	drug associated	0.014374	19.411	0.0292236	NA	NA	0.779	Stabilising	5.416	-0.046	Destabilising	0.909501	Destabilising	138	0.524715	-0.1	3.94
243	Y103S	drug associated	0.00718701	9.70143	0.170979	NA	NA	0.233	Stabilising	5.416	-0.062	Destabilising	1.16175	Destabilising	138	0.524715	-0.1	3.94
244	S104G	drug associated	0.021561	2.42494	0.430259	NA	NA	-0.671	Destabilising	6.519	-0.7	Destabilising	3.32695	Destabilising	1	0.00645161	-0.833333	5.37
245	S104I	others	NA	NA	NA	NA	NA	0.284	Stabilising	6.519	-0.295	Destabilising	0.982352	Destabilising	1	0.00645161	-0.833333	5.37
246	S104R	drug associated	0.057496	14.5803	0.000507535	1.45145	0.0296293	-0.525	Destabilising	6.519	-0.438	Destabilising	-0.736092	Stabilising	1	0.00645161	-0.833333	5.37
247	G105D	drug associated	0.014374	19.411	0.0292236	1.97553	4.52716e-05	-1.651	Destabilising	7.858	0.709	Stabilising	2.15123	Destabilising	0	0	0.533333	7.04
248	G105R	drug associated	0.00718701	9.70143	0.170979	NA	NA	-0.974	Destabilising	7.858	-0.634	Destabilising	5.20362	Destabilising	0	0	0.533333	7.04
249	G105V	drug associated	0.00718701	9.70143	0.170979	NA	NA	0.117	Stabilising	7.858	-0.85	Destabilising	-2.03856	Stabilising	0	0	0.533333	7.04
250	F106C	others	0.00718701	2.42413	1	NA	NA	-1.594	Destabilising	10.466	-1.068	Destabilising	3.977	Destabilising	29	0.120833	-0.366667	5.05
251	F106L	others	0.021561	2.42494	0.430259	NA	NA	-1.425	Destabilising	10.466	-1.708	Destabilising	1.92858	Destabilising	29	0.120833	-0.366667	5.05
252	F106S	drug associated	0.00718701	9.70143	0.170979	NA	NA	-2.455	Destabilising	10.466	-0.439	Destabilising	4.86398	Destabilising	29	0.120833	-0.366667	5.05
253	F106V	others	0.00718701	9.70143	0.170979	NA	NA	-1.933	Destabilising	10.466	-1.625	Destabilising	3.73767	Destabilising	29	0.120833	-0.366667	5.05
254	E107D	others	NA	NA	NA	NA	NA	-0.224	Destabilising	8.13	-0.656	Destabilising	0.965668	Destabilising	88	0.394619	-0.366667	3.69
255	G108E	others	NA	NA	NA	NA	NA	-1.423	Destabilising	10.939	0.303	Stabilising	3.72313	Destabilising	0	0	0.1	5.18
256	G108R	drug associated	0.028748	4.85191	0.137955	1.12555	0.479183	-0.972	Destabilising	10.939	-1.199	Destabilising	8.65723	Destabilising	0	0	0.1	5.18
257	D110H	others	NA	NA	NA	NA	NA	-0.761	Destabilising	16.281	-1.3	Destabilising	3.05477	Destabilising	17	0.0880829	-0.933333	4.81
258	E111D	others	0.00718701	2.42413	1	NA	NA	0.156	Stabilising	18.382	0.103	Stabilising	0.183196	Destabilising	167	0.748879	-3.5	3.55
259	N112Y	others	NA	NA	NA	NA	NA	-0.378	Destabilising	19.93	-0.261	Destabilising	4.97901	Destabilising	109	0.558974	-2.46667	3.54
260	T114M	others	0.00718701	2.42413	1	NA	NA	0.246	Stabilising	17.491	-1.152	Destabilising	-0.0405939	Stabilising	29	0.168605	-0.9	4.57
261	T114P	drug associated	0.00718701	9.70143	0.170979	NA	NA	-0.651	Destabilising	17.491	-1.322	Destabilising	5.39158	Destabilising	29	0.168605	-0.9	4.57
262	P115L	others	0.00718701	2.42413	1	NA	NA	-0.448	Destabilising	16.985	-0.972	Destabilising	0.979724	Destabilising	50	0.314465	0.5	4.3
263	L116P	drug associated	0.021561	9.70467	0.0776845	1.01952	0.885146	-1.386	Destabilising	13.071	-1.504	Destabilising	3.74372	Destabilising	0	0	2	6.86
264	L116R	drug associated	0.00718701	9.70143	0.170979	NA	NA	-1.733	Destabilising	13.071	-0.78	Destabilising	4.65552	Destabilising	0	0	2	6.86
265	L116V	drug associated	0.00718701	2.42413	1	NA	NA	-1.084	Destabilising	13.071	-1.648	Destabilising	1.87491	Destabilising	0	0	2	6.86
266	L117R	others	0.00718701	2.42413	1	NA	NA	-0.678	Destabilising	17.11	-0.585	Destabilising	0.0947913	Destabilising	50	0.248756	1.36667	4.46
267	N118E	others	NA	NA	NA	NA	NA	0.78	Stabilising	19.738	-0.713	Destabilising	-2.32726	Stabilising	80	0.410256	-0.2	4.06
268	W119C	drug associated	0.00718701	9.70143	0.170979	NA	NA	-1.743	Destabilising	19.722	-1.498	Destabilising	4.0665	Destabilising	14	0.0491228	-0.2	5.7
269	W119G	others	0.014374	19.411	0.0292236	NA	NA	-2.983	Destabilising	19.722	-1.84	Destabilising	5.88168	Destabilising	14	0.0491228	-0.2	5.7
270	W119L	others	NA	NA	NA	NA	NA	-1.981	Destabilising	19.722	-2.11	Destabilising	2.39227	Destabilising	14	0.0491228	-0.2	5.7
271	W119R	drug associated	0.050309	6.47411	0.0192725	1.52053	0.000547782	-1.874	Destabilising	19.722	-0.807	Destabilising	3.61213	Destabilising	14	0.0491228	-0.2	5.7
272	W119S	drug associated	0.014374	19.411	0.0292236	2.43709	1.81674e-06	-3.136	Destabilising	19.722	-0.995	Destabilising	4.6385	Destabilising	14	0.0491228	-0.2	5.7
273	L120P	drug associated	0.186862	254.917	1.01651e-20	1.31316	0.000386915	-2.181	Destabilising	17.55	-1.644	Destabilising	7.59698	Destabilising	0	0	-0.533333	8.07
274	L120R	others	0.050309	12.1451	0.0022516	0.939712	0.756299	-2.51	Destabilising	17.55	-0.772	Destabilising	5.6624	Destabilising	0	0	-0.533333	8.07
275	R121P	drug associated	0.00718701	9.70143	0.170979	NA	NA	-0.46	Destabilising	22.533	-1.047	Destabilising	4.90155	Destabilising	125	0.456204	-1.4	3.76
276	R121Q	others	0.00718701	2.42413	1	NA	NA	-0.169	Destabilising	22.533	-0.674	Destabilising	1.41722	Destabilising	125	0.456204	-1.4	3.76
277	R121W	others	NA	NA	NA	NA	NA	-0.538	Destabilising	22.533	-0.426	Destabilising	1.95975	Destabilising	125	0.456204	-1.4	3.76
278	Q122R	others	NA	NA	NA	NA	NA	0.113	Stabilising	24.683	-0.114	Destabilising	-1.69455	Stabilising	132	0.586667	-4.16667	3.49
279	R123G	others	NA	NA	NA	NA	NA	-1.212	Destabilising	23.59	-1.129	Destabilising	2.77078	Destabilising	98	0.357664	-2.8	3.81
280	R123P	drug associated	0.014374	19.411	0.0292236	NA	NA	-0.348	Destabilising	23.59	-0.955	Destabilising	3.53353	Destabilising	98	0.357664	-2.8	3.81
281	G124R	others	NA	NA	NA	NA	NA	-0.757	Destabilising	26.025	-0.075	Destabilising	-0.489243	Stabilising	36	0.346154	-0.233333	3.58
282	G124S	others	0.00718701	2.42413	1	NA	NA	-1.24	Destabilising	26.025	0.612	Stabilising	1.1133	Destabilising	36	0.346154	-0.233333	3.58
283	V125A	others	NA	NA	NA	NA	NA	-2.449	Destabilising	21.367	-1.941	Destabilising	2.08114	Destabilising	0	0	0.1	6.12
284	V125D	drug associated	0.021561	0.807902	1	NA	NA	-3.013	Destabilising	21.367	-0.358	Destabilising	3.9883	Destabilising	0	0	0.1	6.12
285	V125F	others	0.014374	1.21196	1	0.708926	0.0424402	-1.739	Destabilising	21.367	-1.707	Destabilising	4.56	Destabilising	0	0	0.1	6.12
286	V125G	drug associated	0.316228	67.4098	2.05851e-28	1.65183	1.10153e-06	-3.005	Destabilising	21.367	-1.814	Destabilising	3.83404	Destabilising	0	0	0.1	6.12
287	D126E	others	NA	NA	NA	NA	NA	-0.157	Destabilising	23.083	0.035	Stabilising	-0.565957	Stabilising	66	0.341969	-0.933333	4.35
288	E127D	others	NA	NA	NA	NA	NA	-1.341	Destabilising	20.54	-1.005	Destabilising	2.77841	Destabilising	55	0.246637	-0.933333	5.17
289	E127V	others	NA	NA	NA	NA	NA	0.454	Stabilising	20.54	-2.247	Destabilising	-0.86796	Stabilising	55	0.246637	-0.933333	5.17
290	V128F	others	0.00718701	9.70143	0.170979	NA	NA	-1.849	Destabilising	16.575	-2.082	Destabilising	2.63855	Destabilising	0	0	-0.933333	8.31
291	V128G	drug associated	0.100618	29.2345	3.94377e-08	1.44019	5.86551e-07	-3.564	Destabilising	16.575	-1.823	Destabilising	4.66562	Destabilising	0	0	-0.933333	8.31
292	D129G	others	0.00718701	2.42413	1	NA	NA	-0.65	Destabilising	14.781	-3.948	Destabilising	4.68356	Destabilising	0	0	1.63333	7.77
293	D129N	others	0.00718701	2.42413	1	NA	NA	-0.735	Destabilising	14.781	-3.245	Destabilising	1.83782	Destabilising	0	0	1.63333	7.77
294	D129Y	others	0.00718701	9.70143	0.170979	NA	NA	0.187	Stabilising	14.781	-2.832	Destabilising	3.80937	Destabilising	0	0	1.63333	7.77
295	V130A	drug associated	0.00718701	2.42413	1	NA	NA	-2.827	Destabilising	10.402	-1.377	Destabilising	3.70939	Destabilising	0	0	1.63333	11.27
296	V130E	drug associated	0.014374	19.411	0.0292236	NA	NA	-3.207	Destabilising	10.402	-0.292	Destabilising	5.05456	Destabilising	0	0	1.63333	11.27
297	V130G	drug associated	0.014374	19.411	0.0292236	NA	NA	-3.429	Destabilising	10.402	-1.126	Destabilising	5.77612	Destabilising	0	0	1.63333	11.27
298	V130M	others	0.00718701	2.42413	1	NA	NA	-1.539	Destabilising	10.402	-2.265	Destabilising	-0.707302	Stabilising	0	0	1.63333	11.27
299	V131F	drug associated	0.014374	19.411	0.0292236	NA	NA	-1.59	Destabilising	9.063	-2.323	Destabilising	1.54666	Destabilising	1	0.00574713	2.66667	10.36
300	V131G	others	0.014374	19.411	0.0292236	1.24983	0.235261	-3.182	Destabilising	9.063	-1.774	Destabilising	5.35345	Destabilising	1	0.00574713	2.66667	10.36
301	G132A	drug associated	0.057496	14.5803	0.000507535	1.10956	0.241696	-0.829	Destabilising	6.912	-1.92	Destabilising	5.5504	Destabilising	0	0	2.76667	8.75
302	G132D	drug associated	0.043122	58.3312	2.48532e-05	1.76614	0.000417982	-2.518	Destabilising	6.912	-0.822	Destabilising	18.6426	Destabilising	0	0	2.76667	8.75
303	G132S	drug associated	0.057496	77.8406	7.23264e-07	1.76211	3.86845e-06	-2.061	Destabilising	6.912	-0.312	Destabilising	10.5344	Destabilising	0	0	2.76667	8.75
304	I133S	others	0.00718701	9.70143	0.170979	NA	NA	-3.219	Destabilising	3.05	0.578	Stabilising	3.30196	Destabilising	3	0.0152284	1.96667	7.9
305	I133T	drug associated	0.316228	6.43697	2.9004e-09	0.862762	0.00485725	-2.788	Destabilising	3.05	0.703	Stabilising	1.57844	Destabilising	3	0.0152284	1.96667	7.9
306	A134D	others	0.00718701	2.42413	1	NA	NA	-2.98	Destabilising	3.047	0.582	Stabilising	1.03055	Destabilising	10	0.0775194	1.86667	6.77
307	A134G	others	NA	NA	NA	NA	NA	-1.618	Destabilising	3.047	-0.378	Destabilising	-1.28536	Stabilising	10	0.0775194	1.86667	6.77
308	A134P	others	0.00718701	9.70143	0.170979	NA	NA	-1.426	Destabilising	3.047	0.077	Stabilising	-5.2012	Stabilising	10	0.0775194	1.86667	6.77
309	A134T	others	NA	NA	NA	NA	NA	-1.925	Destabilising	3.047	0.875	Stabilising	-0.943073	Stabilising	10	0.0775194	1.86667	6.77
310	A134V	drug associated	0.035935	19.4257	0.00368169	1.53175	3.06824e-05	-0.414	Destabilising	3.047	0.118	Stabilising	-1.46184	Stabilising	10	0.0775194	1.86667	6.77
311	T135A	others	NA	NA	NA	NA	NA	-0.347	Destabilising	6.021	-1.324	Destabilising	0.939971	Destabilising	3	0.0174419	-0.8	5.97
312	T135I	others	0.00718701	2.42413	1	NA	NA	0.442	Stabilising	6.021	-1.039	Destabilising	-0.624872	Stabilising	3	0.0174419	-0.8	5.97
313	T135P	drug associated	0.194049	127.448	2.29679e-19	1.39439	5.1878e-08	-0.141	Destabilising	6.021	-1.103	Destabilising	4.22994	Destabilising	3	0.0174419	-0.8	5.97
314	T135S	others	0.00718701	2.42413	1	NA	NA	-1.605	Destabilising	6.021	-0.709	Destabilising	0.77889	Destabilising	3	0.0174419	-0.8	5.97
315	D136A	others	0.00718701	9.70143	0.170979	NA	NA	0.66	Stabilising	6.179	-2.506	Destabilising	1.50112	Destabilising	6	0.0310881	-2.46667	5.37
316	D136G	drug associated	0.0862441	3.46853	0.0400826	0.703707	0.000496226	0.314	Stabilising	6.179	-2.578	Destabilising	2.04991	Destabilising	6	0.0310881	-2.46667	5.37
317	D136N	drug associated	0.050309	3.63984	0.101884	0.841605	0.293372	0.216	Stabilising	6.179	-1.58	Destabilising	0.961088	Destabilising	6	0.0310881	-2.46667	5.37
318	D136Y	drug associated	0.021561	29.1288	0.00499313	1.5843	0.000593231	-0.96	Destabilising	6.179	-1.662	Destabilising	6.12929	Destabilising	6	0.0310881	-2.46667	5.37
319	H137N	others	0.00718701	2.42413	1	NA	NA	0.189	Stabilising	3.419	-0.124	Destabilising	0.40144	Destabilising	84	0.375	-1.4	4.6
320	H137P	drug associated	NA	NA	NA	NA	NA	0.366	Stabilising	3.419	-0.765	Destabilising	2.19045	Destabilising	84	0.375	-1.4	4.6
321	H137R	drug associated	0.028748	4.85191	0.137955	0.559639	0.000121185	-0.272	Destabilising	3.419	0.466	Stabilising	0.488665	Destabilising	84	0.375	-1.4	4.6
322	H137Y	others	0.00718701	2.42413	1	NA	NA	0.859	Stabilising	3.419	-0.005	Destabilising	0.344473	Destabilising	84	0.375	-1.4	4.6
323	C138G	others	NA	NA	NA	NA	NA	-0.015	Destabilising	3.282	-0.012	Destabilising	1.12063	Destabilising	12	0.0718563	1.16667	6.7
324	C138R	drug associated	0.0862441	116.958	6.09961e-10	1.74395	4.0793e-12	0.099	Stabilising	3.282	0.35	Stabilising	-2.11829	Stabilising	12	0.0718563	1.16667	6.7
325	C138S	drug associated	NA	NA	NA	NA	NA	-0.002	Destabilising	3.282	0.814	Stabilising	-0.229289	Stabilising	12	0.0718563	1.16667	6.7
326	C138W	others	NA	NA	NA	NA	NA	-1.048	Destabilising	3.282	0.943	Stabilising	-1.71951	Stabilising	12	0.0718563	1.16667	6.7
327	C138Y	drug associated	NA	NA	NA	NA	NA	-0.518	Destabilising	3.282	0.914	Stabilising	-0.565013	Stabilising	12	0.0718563	1.16667	6.7
328	V139A	drug associated	0.186862	4.86982	0.00011707	1.11987	0.0693899	-1.598	Destabilising	5.113	-0.537	Destabilising	2.24246	Destabilising	0	0	0.733333	9.18
329	V139G	drug associated	0.0646831	38.9169	5.52283e-06	1.10634	0.243335	-2.377	Destabilising	5.113	-0.4	Destabilising	4.03008	Destabilising	0	0	0.733333	9.18
330	V139L	drug associated	0.0790571	21.8981	4.8628e-06	1.30464	0.070199	-0.462	Destabilising	5.113	-0.504	Destabilising	-1.24107	Stabilising	0	0	0.733333	9.18
331	V139M	drug associated	0.0646831	38.9169	5.52283e-06	1.20258	0.251346	-0.944	Destabilising	5.113	-1.067	Destabilising	-0.87501	Stabilising	0	0	0.733333	9.18
332	R140G	drug associated	NA	NA	NA	NA	NA	-1.398	Destabilising	7.347	-1.735	Destabilising	5.02413	Destabilising	58	0.211679	-1.26667	5.39
333	R140H	drug associated	NA	NA	NA	NA	NA	-1.041	Destabilising	7.347	-1.013	Destabilising	2.29767	Destabilising	58	0.211679	-1.26667	5.39
334	R140P	drug associated	0.021561	29.1288	0.00499313	1.66283	6.59616e-05	-0.818	Destabilising	7.347	-1.466	Destabilising	6.54201	Destabilising	58	0.211679	-1.26667	5.39
335	R140S	drug associated	0.00718701	2.42413	1	NA	NA	-1.705	Destabilising	7.347	-1.646	Destabilising	4.37186	Destabilising	58	0.211679	-1.26667	5.39
336	Q141P	drug associated	0.194049	28.1423	1.80102e-14	1.62834	2.37529e-14	0.901	Stabilising	8.108	-1.656	Destabilising	5.02461	Destabilising	41	0.182222	-2.9	5.08
337	Q141R	others	0.014374	1.21196	1	NA	NA	0.765	Stabilising	8.108	-1.581	Destabilising	1.88305	Destabilising	41	0.182222	-2.9	5.08
338	T142A	drug associated	0.057496	14.5803	0.000507535	1.58554	0.000665443	-0.572	Destabilising	8.098	-1.983	Destabilising	2.85915	Destabilising	0	0	-0.8	8.33
339	T142K	drug associated	0.021561	29.1288	0.00499313	NA	NA	-0.83	Destabilising	8.098	-1.238	Destabilising	3.49705	Destabilising	0	0	-0.8	8.33
340	T142M	drug associated	0.021561	9.70467	0.0776845	1.42517	0.0389669	0.175	Stabilising	8.098	-1.836	Destabilising	-0.886939	Stabilising	0	0	-0.8	8.33
341	T142P	drug associated	0.014374	19.411	0.0292236	NA	NA	-0.706	Destabilising	8.098	-1.638	Destabilising	6.72536	Destabilising	0	0	-0.8	8.33
342	T142R	others	NA	NA	NA	NA	NA	-0.733	Destabilising	8.098	-1.267	Destabilising	5.15889	Destabilising	0	0	-0.8	8.33
343	A143D	drug associated	0.014374	4.85029	0.312734	0.989097	0.948439	-3.46	Destabilising	10.807	0.346	Stabilising	5.46827	Destabilising	0	0	-0.8	8.82
344	A143G	others	0.035935	48.5889	0.000145612	1.61957	0.0202865	-2.08	Destabilising	10.807	-0.868	Destabilising	2.31533	Destabilising	0	0	-0.8	8.82
345	A143P	drug associated	NA	NA	NA	NA	NA	-1.416	Destabilising	10.807	-0.732	Destabilising	2.35082	Destabilising	0	0	-0.8	8.82
346	A143T	drug associated	0.014374	4.85029	0.312734	NA	NA	-2.359	Destabilising	10.807	0.07	Stabilising	0.406768	Destabilising	0	0	-0.8	8.82
347	A143V	others	0.035935	0.484657	0.596112	0.643925	0.00373727	-0.622	Destabilising	10.807	-1.168	Destabilising	0.113853	Destabilising	0	0	-0.8	8.82
348	D145E	drug associated	0.00718701	9.70143	0.170979	NA	NA	-0.148	Destabilising	11.649	-1.031	Destabilising	-0.4769	Stabilising	33	0.170984	-1.73333	4.71
349	D145Y	others	0.00718701	9.70143	0.170979	NA	NA	-0.409	Destabilising	11.649	-1.689	Destabilising	-0.814413	Stabilising	33	0.170984	-1.73333	4.71
350	A146E	drug associated	0.014374	19.411	0.0292236	NA	NA	-2.184	Destabilising	14.858	0.284	Stabilising	3.30206	Destabilising	0	0	0.833333	7.08
351	A146P	others	0.00718701	9.70143	0.170979	NA	NA	-1.233	Destabilising	14.858	-1.497	Destabilising	3.10964	Destabilising	0	0	0.833333	7.08
352	A146T	drug associated	0.0718701	7.28887	0.0027831	0.897113	0.402229	-2.074	Destabilising	14.858	-0.252	Destabilising	1.48094	Destabilising	0	0	0.833333	7.08
353	A146V	drug associated	0.100618	63.3736	1.22416e-09	1.38989	0.0031481	-0.425	Destabilising	14.858	-1.712	Destabilising	0.463909	Destabilising	0	0	0.833333	7.08
354	R148C	others	NA	NA	NA	NA	NA	-0.277	Destabilising	14.673	-0.94	Destabilising	1.80299	Destabilising	156	0.569343	-1.26667	3.5
355	N149D	others	NA	NA	NA	NA	NA	0.469	Stabilising	16.469	-0.043	Destabilising	1.84951	Destabilising	71	0.364103	-2.8	3.68
356	N149S	others	NA	NA	NA	NA	NA	-0.42	Destabilising	16.469	-0.233	Destabilising	0.889156	Destabilising	71	0.364103	-2.8	3.68
357	N149V	others	0.00718701	9.70143	0.170979	NA	NA	-0.064	Destabilising	16.469	-0.706	Destabilising	0.446809	Destabilising	71	0.364103	-2.8	3.68
358	G150D	others	0.00718701	9.70143	0.170979	NA	NA	-0.785	Destabilising	21.16	1.269	Stabilising	3.55888	Destabilising	63	0.605769	-0.0333333	3.34
359	L151S	drug associated	0.100618	8.75696	0.000107724	1.15507	0.0989447	-2.523	Destabilising	18.507	0.079	Stabilising	3.86505	Destabilising	10	0.0497512	1.73333	5.31
360	L151V	others	NA	NA	NA	NA	NA	-1.74	Destabilising	18.507	-1.269	Destabilising	1.09305	Destabilising	10	0.0497512	1.73333	5.31
361	L151W	others	0.00718701	9.70143	0.170979	NA	NA	-1.831	Destabilising	18.507	-0.714	Destabilising	2.01402	Destabilising	10	0.0497512	1.73333	5.31
362	T153I	others	NA	NA	NA	NA	NA	0.532	Stabilising	15.544	-2.111	Destabilising	-0.698929	Stabilising	12	0.0697674	-1.13333	5.38
363	T153P	others	0.00718701	9.70143	0.170979	NA	NA	-0.926	Destabilising	15.544	-2.212	Destabilising	3.60938	Destabilising	12	0.0697674	-1.13333	5.38
364	R154G	drug associated	0.114992	34.1357	1.50118e-09	1.25312	0.0804536	-1.337	Destabilising	15.259	-2.707	Destabilising	4.31639	Destabilising	60	0.218978	-0.333333	5.21
365	R154S	others	NA	NA	NA	NA	NA	-2.044	Destabilising	15.259	-2.614	Destabilising	2.37151	Destabilising	60	0.218978	-0.333333	5.21
366	R154W	others	NA	NA	NA	NA	NA	-0.436	Destabilising	15.259	-1.381	Destabilising	2.7463	Destabilising	60	0.218978	-0.333333	5.21
367	V155A	drug associated	0.00718701	9.70143	0.170979	NA	NA	-3.049	Destabilising	12.302	-1.886	Destabilising	3.6527	Destabilising	0	0	1.16667	7.97
368	V155G	drug associated	0.043122	24.2923	0.000749407	1.39795	0.00225072	-3.675	Destabilising	12.302	-1.655	Destabilising	5.87683	Destabilising	0	0	1.16667	7.97
369	V155L	drug associated	0.00718701	9.70143	0.170979	NA	NA	-1.141	Destabilising	12.302	-2.349	Destabilising	-0.756754	Stabilising	0	0	1.16667	7.97
370	V155M	drug associated	0.043122	58.3312	2.48532e-05	1.62793	0.000218826	-1.505	Destabilising	12.302	-2.486	Destabilising	-0.575554	Stabilising	0	0	1.16667	7.97
371	L156P	drug associated	0.014374	19.411	0.0292236	1.81757	0.000128776	-2.813	Destabilising	13.994	-1.81	Destabilising	2.74955	Destabilising	0	0	4.06667	6.53
372	L156Q	others	0.00718701	9.70143	0.170979	NA	NA	-2.863	Destabilising	13.994	-0.36	Destabilising	2.41139	Destabilising	0	0	4.06667	6.53
373	V157A	others	0.00718701	9.70143	0.170979	NA	NA	-1.625	Destabilising	13.632	-0.931	Destabilising	0.858959	Destabilising	45	0.258621	1.5	4.12
374	V157G	others	0.00718701	9.70143	0.170979	NA	NA	-1.896	Destabilising	13.632	-0.926	Destabilising	1.97999	Destabilising	45	0.258621	1.5	4.12
375	V157L	others	NA	NA	NA	NA	NA	-0.484	Destabilising	13.632	-0.972	Destabilising	-2.04339	Stabilising	45	0.258621	1.5	4.12
376	L159P	drug associated	NA	NA	NA	NA	NA	-1.412	Destabilising	11.435	-1.752	Destabilising	6.08412	Destabilising	6	0.0298507	-0.133333	5.42
377	L159R	drug associated	0.050309	68.0818	4.24049e-06	2.06382	1.67544e-10	-0.753	Destabilising	11.435	-1.154	Destabilising	0.0571382	Destabilising	6	0.0298507	-0.133333	5.42
378	L159V	drug associated	0.014374	4.85029	0.312734	1.03453	0.833697	-1.126	Destabilising	11.435	-1.82	Destabilising	2.84083	Destabilising	6	0.0298507	-0.133333	5.42
379	T160A	drug associated	0.057496	77.8406	7.23264e-07	1.43285	0.0281434	-0.842	Destabilising	9.847	-2.509	Destabilising	2.1045	Destabilising	22	0.127907	1.63333	4.98
380	T160P	drug associated	0.021561	29.1288	0.00499313	NA	NA	-0.79	Destabilising	9.847	-2.375	Destabilising	3.37194	Destabilising	22	0.127907	1.63333	4.98
381	T160R	drug associated	0.014374	19.411	0.0292236	NA	NA	-0.456	Destabilising	9.847	-2.007	Destabilising	2.8141	Destabilising	22	0.127907	1.63333	4.98
382	A161G	others	NA	NA	NA	NA	NA	-0.745	Destabilising	7.033	-0.925	Destabilising	2.35053	Destabilising	11	0.0852713	0.233333	4.53
383	A161V	others	NA	NA	NA	NA	NA	0.043	Stabilising	7.033	-0.846	Destabilising	-2.66025	Stabilising	11	0.0852713	0.233333	4.53
384	G162A	others	NA	NA	NA	NA	NA	-0.551	Destabilising	8.315	-0.164	Destabilising	0.560964	Destabilising	26	0.25	1.86667	3.93
385	G162D	drug associated	0.028748	38.8547	0.000852828	1.76723	1.29592e-05	-1.037	Destabilising	8.315	2.23	Stabilising	3.43178	Destabilising	26	0.25	1.86667	3.93
386	G162R	others	NA	NA	NA	NA	NA	-0.44	Destabilising	8.315	-0.04	Destabilising	3.42463	Destabilising	26	0.25	1.86667	3.93
387	G162S	others	NA	NA	NA	NA	NA	-0.866	Destabilising	8.315	0.821	Stabilising	0.905309	Destabilising	26	0.25	1.86667	3.93
388	G162V	others	NA	NA	NA	NA	NA	-0.386	Destabilising	8.315	-0.162	Destabilising	2.07181	Destabilising	26	0.25	1.86667	3.93
389	V163A	others	0.021561	0.807902	1	0.584892	0.00168258	-0.478	Destabilising	6.663	0.052	Stabilising	0.471406	Destabilising	87	0.5	1	4.02
390	V163G	others	0.014374	1.21196	1	NA	NA	-0.815	Destabilising	6.663	0.031	Stabilising	1.14986	Destabilising	87	0.5	1	4.02
391	V163L	others	0.00718701	2.42413	1	NA	NA	-0.098	Destabilising	6.663	0.072	Stabilising	-0.813595	Stabilising	87	0.5	1	4.02
392	S164P	drug associated	0.043122	58.3312	2.48532e-05	1.41439	0.00160506	-0.304	Destabilising	10.588	-0.348	Destabilising	4.82419	Destabilising	46	0.296774	1.73333	3.92
393	T167I	others	0.014374	4.85029	0.312734	NA	NA	0.627	Stabilising	10.663	-0.489	Destabilising	0.429573	Destabilising	57	0.331395	-1.63333	4.06
394	T168I	others	0.028748	0.605874	1	0.917176	0.655882	0.963	Stabilising	10.468	-1.201	Destabilising	-0.7812	Stabilising	24	0.139535	0.933333	4.77
395	T168N	drug associated	NA	NA	NA	NA	NA	-0.505	Destabilising	10.468	-0.341	Destabilising	0.148032	Destabilising	24	0.139535	0.933333	4.77
396	T168P	drug associated	NA	NA	NA	NA	NA	0.151	Stabilising	10.468	-1.31	Destabilising	3.22365	Destabilising	24	0.139535	0.933333	4.77
397	T168S	others	0.028748	1.61648	0.527694	1.12529	0.444825	-0.382	Destabilising	10.468	-0.83	Destabilising	0.47424	Destabilising	24	0.139535	0.933333	4.77
398	A171E	drug associated	0.014374	1.21196	1	NA	NA	-2.671	Destabilising	10.476	1.116	Stabilising	3.52921	Destabilising	5	0.0387597	2.46667	5.33
399	A171P	drug associated	NA	NA	NA	NA	NA	-1.241	Destabilising	10.476	-1.239	Destabilising	4.26761	Destabilising	5	0.0387597	2.46667	5.33
400	A171T	drug associated	0.035935	0.484657	0.596112	0.57542	2.22878e-05	-1.816	Destabilising	10.476	0.043	Stabilising	0.486585	Destabilising	5	0.0387597	2.46667	5.33
401	A171V	drug associated	0.014374	4.85029	0.312734	NA	NA	-0.659	Destabilising	10.476	-1.298	Destabilising	0.499158	Destabilising	5	0.0387597	2.46667	5.33
402	L172P	drug associated	0.0718701	43.8	1.04401e-06	1.47294	1.03447e-05	-1.821	Destabilising	13.187	-1.353	Destabilising	4.7117	Destabilising	51	0.253731	0.7	4.4
403	L172R	drug associated	0.014374	19.411	0.0292236	2.15968	8.7675e-07	-0.848	Destabilising	13.187	-0.704	Destabilising	-0.385063	Stabilising	51	0.253731	0.7	4.4
404	E173G	others	NA	NA	NA	NA	NA	-1.172	Destabilising	15.936	-0.78	Destabilising	0.769667	Destabilising	114	0.511211	-1.06667	3.82
405	E174D	others	0.00718701	9.70143	0.170979	NA	NA	-0.698	Destabilising	14.835	-0.016	Destabilising	0.557649	Destabilising	104	0.466368	-1.7	3.93
406	E174G	drug associated	0.014374	1.21196	1	NA	NA	-0.868	Destabilising	14.835	-1.181	Destabilising	0.834042	Destabilising	104	0.466368	-1.7	3.93
407	E174K	others	NA	NA	NA	NA	NA	0.204	Stabilising	14.835	-0.819	Destabilising	-0.813418	Stabilising	104	0.466368	-1.7	3.93
408	M175I	drug associated	0.028748	1.61648	0.527694	0.594378	0.000231893	-0.676	Destabilising	11.016	-1.143	Destabilising	1.67797	Destabilising	0	0	-2.03333	6.81
409	M175K	drug associated	0.00718701	9.70143	0.170979	NA	NA	-1.311	Destabilising	11.016	-0.207	Destabilising	2.59826	Destabilising	0	0	-2.03333	6.81
410	M175R	drug associated	0.00718701	9.70143	0.170979	NA	NA	-1.175	Destabilising	11.016	-0.698	Destabilising	2.37207	Destabilising	0	0	-2.03333	6.81
411	M175T	drug associated	0.021561	29.1288	0.00499313	2.21354	5.40661e-06	-2.131	Destabilising	11.016	0.116	Stabilising	2.83612	Destabilising	0	0	-2.03333	6.81
412	M175V	drug associated	0.0718701	11.344	0.000313794	1.24211	0.016303	-1.251	Destabilising	11.016	-1.081	Destabilising	2.746	Destabilising	0	0	-2.03333	6.81
413	R176C	others	NA	NA	NA	NA	NA	-0.417	Destabilising	17.132	-0.881	Destabilising	1.53676	Destabilising	188	0.686131	-1.1	3.67
414	T177P	others	0.028748	4.85191	0.137955	NA	NA	-0.045	Destabilising	19.207	-0.36	Destabilising	0.790967	Destabilising	126	0.732558	-1.13333	3.45
415	A178P	others	NA	NA	NA	NA	NA	-0.485	Destabilising	17.128	-0.05	Destabilising	2.01949	Destabilising	32	0.248062	0.1	3.71
416	S179I	others	0.00718701	2.42413	1	NA	NA	0.381	Stabilising	19.449	-0.451	Destabilising	1.25588	Destabilising	87	0.56129	1.73333	3.5
417	V180A	others	0.014374	19.411	0.0292236	NA	NA	-2.048	Destabilising	15.436	-1.661	Destabilising	2.8049	Destabilising	6	0.0344828	-0.0333333	5.26
418	V180F	drug associated	0.057496	14.5803	0.000507535	1.35888	0.0122144	-1.808	Destabilising	15.436	-1.073	Destabilising	10.5926	Destabilising	6	0.0344828	-0.0333333	5.26
419	V180G	drug associated	0.0790571	107.166	3.5812e-09	1.55432	3.36668e-08	-2.785	Destabilising	15.436	-1.577	Destabilising	4.93179	Destabilising	6	0.0344828	-0.0333333	5.26
420	V180L	others	NA	NA	NA	NA	NA	-0.877	Destabilising	15.436	-1.664	Destabilising	-0.0108685	Stabilising	6	0.0344828	-0.0333333	5.26
421	L182F	others	0.00718701	2.42413	1	NA	NA	-1.168	Destabilising	15.184	-0.294	Destabilising	4.99445	Destabilising	50	0.248756	1.5	4.17
422	L182S	drug associated	0.0718701	4.85678	0.0171758	0.944684	0.566753	-2.349	Destabilising	15.184	0.38	Stabilising	5.37676	Destabilising	50	0.248756	1.5	4.17
423	L182W	others	NA	NA	NA	NA	NA	-1.318	Destabilising	15.184	-0.228	Destabilising	4.86413	Destabilising	50	0.248756	1.5	4.17
424	V183L	others	0.014374	1.21196	1	NA	NA	-0.423	Destabilising	17.921	-0.108	Destabilising	-0.102908	Stabilising	34	0.195402	3.5	4.1
